# Supplementary material for: Non-steady state validation of kinetic models for ethylene epoxidation over silver catalysts
Source: Royal Society of Chemistry journal article supplement (doi:10.1039/d4cy00052h), 2024-01-01
Supplement: d4cy00052h2.pdf [file d4cy00052h2.pdf]

# Non-Steady State Validation of Kinetic Models for Ethylene Epoxidation over Silver Catalysts

Lilliana Brandão<sup>1</sup> and Christian Reece<sup>1\*</sup>

1. Rowland Institute at Harvard, Harvard University, Cambridge, Massachusetts 02142, United States

\*Corresponding author: [christianreece@fas.harvard.edu](mailto:christianreece@fas.harvard.edu)

## Supplementary Information

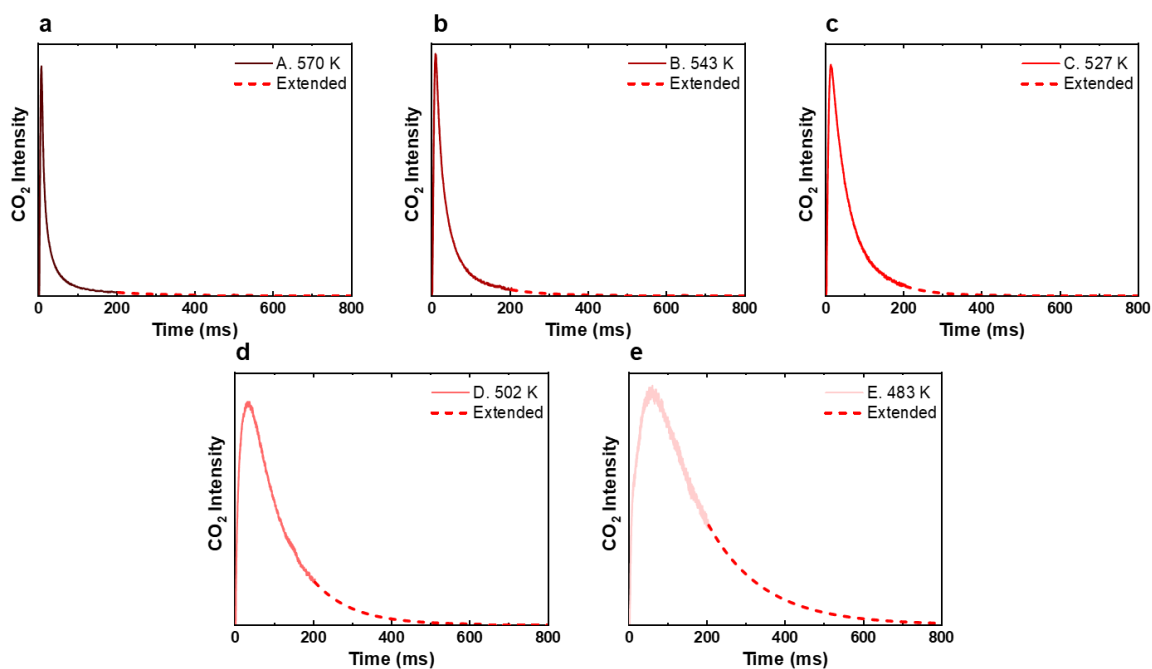

**Figure S1.** Extrapolated CO<sub>2</sub> response curves from the Gleaves-Madix experiment<sup>1</sup> where the tail of the curve is expanded to 1000 ms using a single exponential function fit to tail of the curve from 120 – 200 ms.<sup>2</sup> Experimental data was adapted from ref.<sup>1</sup>

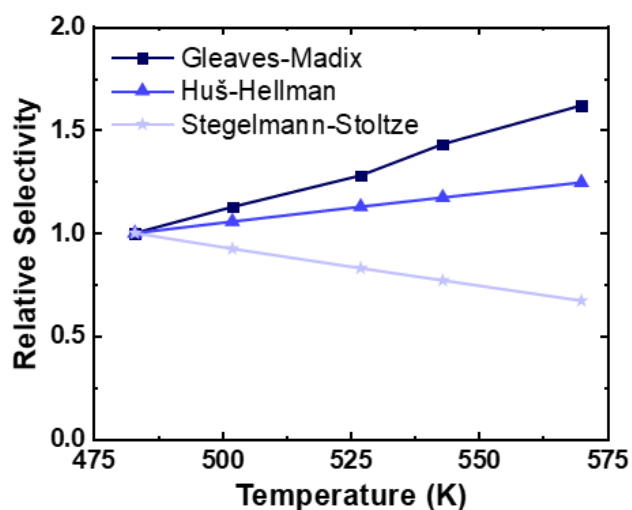

**Figure S2.** Experimental and simulated relative selectivity (normalised to 483 K) for the single-pulse experiments in which ethylene and O<sub>2</sub> were pulsed over the clean catalyst at varying temperatures from 483 – 570 K. Experimental data was adapted from ref.<sup>1</sup>

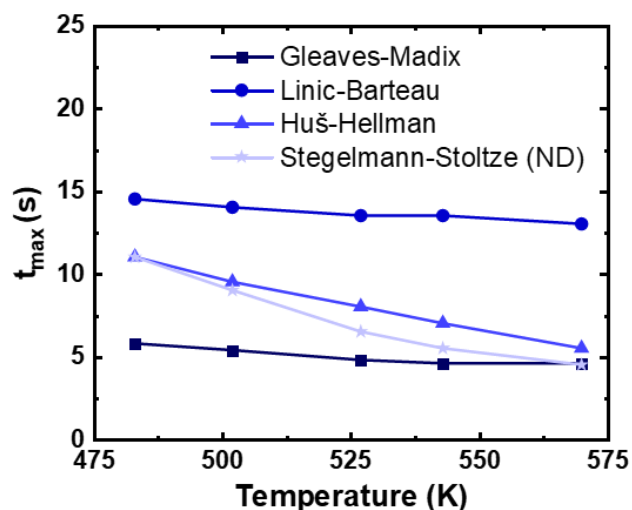

**Figure S3.** Experimental and simulated time of maximum ethylene oxide production ( $t_{\max}$ ) as a function of temperature for the simulations with the Stegelmann-Stoltze model modified to turn off oxygen desorption (ND). Experimental data was adapted from ref.<sup>1</sup>

## References

- 1 J. T. Gleaves, A. G. Sault, R. J. Madix and J. R. Ebner, *Journal of Catalysis*, 1990, **121**, 202–218.

2K. Morgan, A. Goguet, C. Hardacre, E. V. Kondratenko, C. McManus and S. O. Shekhtman, *Catalysis Science and Technology*, 2014, **4**, 3665–3671.
